# Supplementary material
Source: publisher site journal article supplement (https://www.dovepress.com/article/371183)
Supplement: Supplementary file 1 [file get_supplementary_file.php]

**Supplementary material**

**Microneedle Patch Delivery of Methotrexate-loaded Albumin Nanoparticles to Immune Cells Achieves a Potent Antipsoriatic Effect**


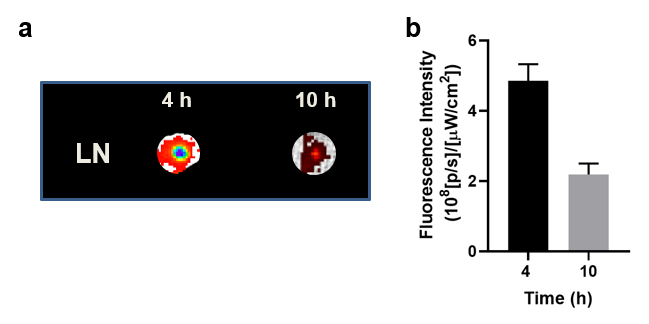


**Fig. S1 a)** Fluorescence images of LN and b) ROI analysis of fluorescent intensities from the LNs at 4 and 10 h after the administration.
